# Supplementary material for: A Nomogram for Predicting the Recurrence of Acute Non-Cardioembolic Ischemic Stroke: A Retrospective Hospital-Based Cohort Analysis
Source: MDPI journal article supplement (doi:10.3390/brainsci13071051), 2023-07-10
Supplement: s1 [file s1]

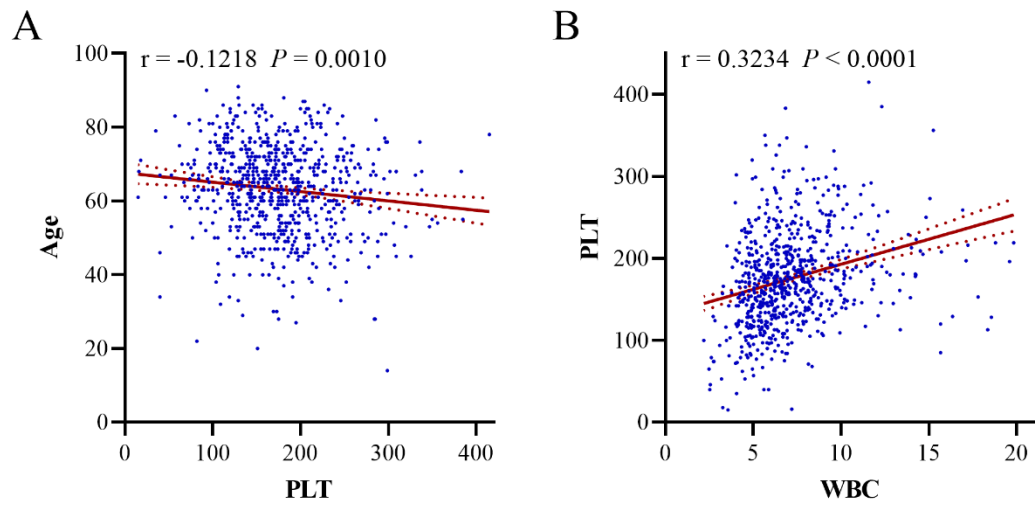

**Supplement Figure S1.** The correlation between PLT with age and WBC in non-cardioembolic IS patients. **(A):** PLT was negatively correlated with age ( $r = -0.1218$ ,  $p = 0.0010$ ). **(B):** PLT counts were significantly positively correlated with WBC counts ( $r = 0.3234$ ,  $p < 0.0001$ ).
